# Supplementary material for: Scalable approach for the realization of garland shaped 3D assembly of CuTCNQ nanorods: an efficient electron emitter
Source: Royal Society of Chemistry journal article supplement (doi:10.1039/c4tc00227j), 2014-01-01
Supplement: c4tc00227j1.pdf [file c4tc00227j1.pdf]

## **CHARACTERIZATION:**

Morphology of the synthesized products was inspected by field emission scanning electron microscope (HITACHI S-4800). Crystallinity and phase of the samples were examined by x-ray diffractometer (XRD, D8 Advanced Bruker). Compositional analysis of the hierarchy sample was investigated by X-ray photoelectron spectroscopy (XPS) using SPECS HSA-3500 hemispherical analyzer with monochromatic Mg K $\alpha$  x-ray source. Phase purity of the samples was further characterized by Fourier transform infrared (FTIR) spectroscopy (Shimadzu FTIR spectrometer (IR Prestige)) and Raman spectroscopy (WITec alpha 300RA Raman confocal microscope with 532 nm diode laser). The field emission performance was investigated in a high vacuum system under vacuum  $\sim 2 \times 10^{-6}$  mbar with a parallel plate configuration where CuTCNQ hierarchical samples on conducting carbon tape pasted on steel slab served as the cathode and a conically shaped stainless steel electrode as the anode having tip diameter  $\sim 1.5$  mm.

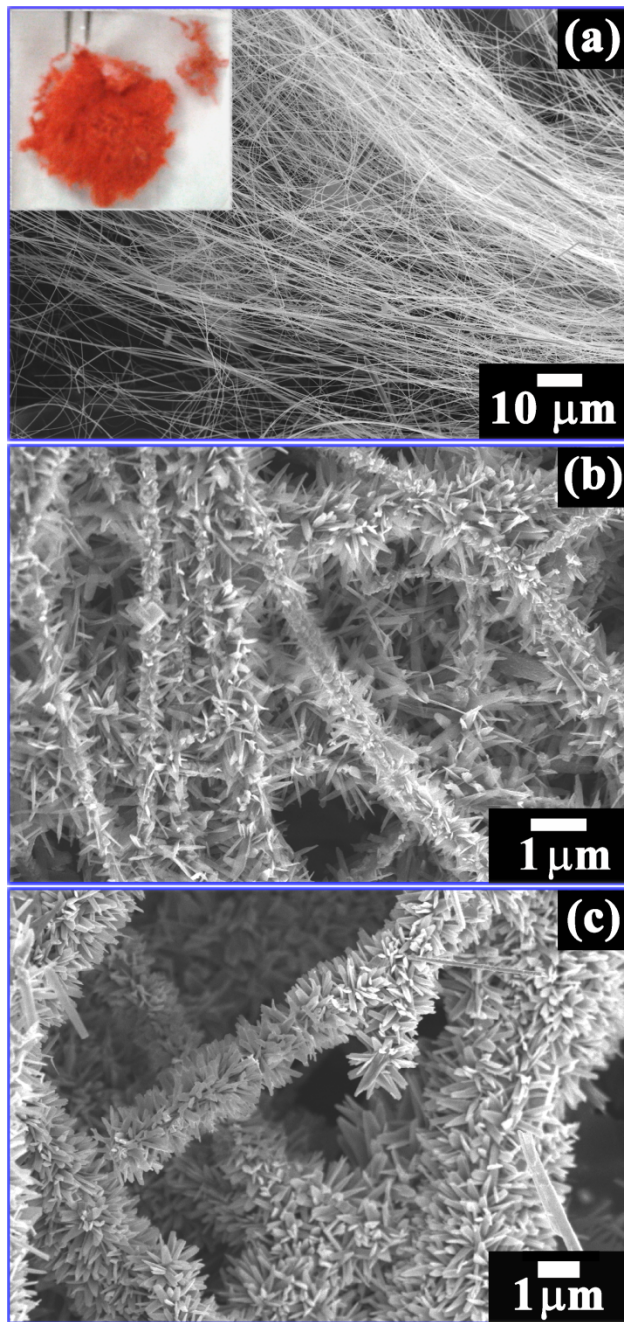

**S1:** FESEM images of (a) Cu nanowires (inset showing digital image); (b) CuTCNQ nano-hierarchy (T2) and (c) CuTCNQ nano-garland (T5) showing scalability.

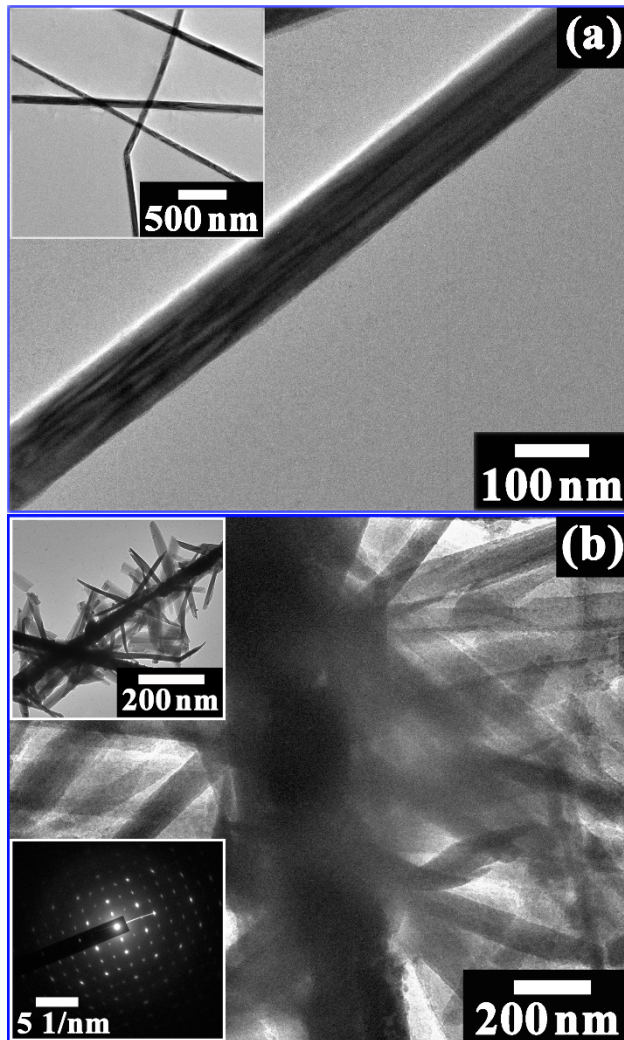

**S2:** TEM images of (a) Cu nanowire (inset shows the low magnification image); (b) T5 (upper inset for T2) and SAED of T5 in the lower inset.

**TABLE S1:** Comparison of the reported field emission data

| <b>Nanostructures</b>                    | <b>Turn-on field<br/>(V/<math>\mu\text{m}</math>)</b> | <b>Threshold<br/>Filed<br/>(V/<math>\mu\text{m}</math>)</b> | <b>Field enhancement factor<br/>(<math>\beta</math>)</b> | <b>Ref.</b>  |
|------------------------------------------|-------------------------------------------------------|-------------------------------------------------------------|----------------------------------------------------------|--------------|
| CuTCNQ nanowires                         | 2.56 (10 $\mu\text{A}$ )                              | 6.33 (1 mA)                                                 | 2559                                                     | 1            |
| AgTCNQ nanowires<br>on carbon fiber      | 1.72 (10 $\mu\text{A}$ )                              | 4.21 (1 Ma)                                                 | 1165                                                     |              |
| ZnO nanowires                            | 8.0–10.0                                              | .....                                                       | 860                                                      | 2            |
| CuTCNQF4 NWs                             | 5.48 (10 $\mu\text{A}$ )                              | 7.43(1 mA)                                                  | .....                                                    | 3            |
| AgTCNQF4 NWs                             | 5.21(10 $\mu\text{A}$ )                               | 13.4(1 mA)                                                  |                                                          |              |
| CuTCNQ nanorod                           | 7.1 (10 $\mu\text{A}$ )                               | 13.8 (10 mA)                                                | 463                                                      | 4            |
| Ag-TCNQ nanowires                        | 13.5,9.3 and 11.5<br>(10 $\mu\text{A}$ )              | .....                                                       | 100                                                      | 5            |
| SWCNT                                    | 1.5–4.5 (10 $\mu\text{A}$ )                           | 3.9–7.8 (10 mA)                                             | 2500–10000                                               | 6            |
| MWCNT                                    | 2.44                                                  | .....                                                       | 9250                                                     | 7            |
| AgTCNQ nanowires                         | 2.58 (10 $\mu\text{A}$ )                              | .....                                                       | .....                                                    | 8            |
| CuTCNQ nanowires                         | 3.13 (10 $\mu\text{A}$ )                              |                                                             |                                                          |              |
| ZnO nanowire array                       | 4.5 (10 $\mu\text{A}$ )                               | 9 (1 mA)                                                    | 2670                                                     | 9            |
| NbS <sub>2</sub> nanowires               | 2.5                                                   | .....                                                       | .....                                                    | 10           |
| CuTCNQ nanotube arrays                   | 4.49 (10 $\mu\text{A}$ )                              | ----                                                        | 699                                                      | 11           |
| CuO nanowires                            | 3.0-3.6(10 $\mu\text{A}$ )                            | .....                                                       | .....                                                    | 12           |
| In <sub>2</sub> O <sub>3</sub> nanowires | 7 (1 $\mu\text{A}$ )                                  | 11.3 (1mA)                                                  | .....                                                    | 13           |
| GaN nanowires                            | 8.5 (0.1 $\mu\text{A}$ )                              | .....                                                       | 1170                                                     | 14           |
| CuTCPQ nanorods                          | 2.70 (10 $\mu\text{A}$ )                              | 5.05 (1mA)                                                  | .....                                                    | 15           |
| WO <sub>3</sub> nanowires                | 4.8 (10 $\mu\text{A}$ )                               | .....                                                       | .....                                                    | 16           |
| Si nanowires                             | 7.3 (10 $\mu\text{A}$ )                               | .....                                                       | 424                                                      | 17           |
| ITO/Ag/Ag(TCNQ)                          | 6 (10 $\mu\text{A}$ )                                 | .....                                                       | .....                                                    | 18           |
| ITO/Cu/Cu(TCNQ)                          | 2.2 (10 $\mu\text{A}$ )                               |                                                             |                                                          |              |
| TiO <sub>2</sub> nanowires               | 5.7(10 $\mu\text{A}$ )                                | 6.7(10mA)                                                   | 3896 and 1650                                            | 19           |
| CuTCNQ nano-hierarchy                    | 2.69 (10 $\mu\text{A}$ )                              | 6.11 (10 mA)                                                | 2366                                                     | This<br>work |

## Reference:

- [1] S. Maiti, U. N. Maiti, S. Pal and K. K. Chattopadhyay, *Nanotechnology*, 2013, **24**, 465601.
- [2] X. D. Wang, J. Zhou, C.Lao, J. Song, N. Xu and Z. L. Wang, *Adv. Mater.*, 2007, **19**, 1627.
- [3] C. Ouyang, Y. Guo, H. Liu, Y. Zhao, G. Li, Y. Li, Y. Song, and Y. Li, *J. Phys. Chem. C*, 2009, **113**, 7044.
- [4] H. Liu, X. Wu, L. Chi, D. Zhong, Q. Zhao, Y. Li, D. Yu, H. Fuchs and D. Zhu, *J. Phys. Chem. C*, 2008, **112**, 17625.
- [5] C. Ye, K. Zheng, W. You, G. Chen, *Nanoscale Res Lett.*, 2010, **5**, 1307.
- [6] J.-M. Bonard, J.-P. Salvetat, T. Stöckli, W.A. de Heer, L. Forró, A. Chatelain, *Appl. Phys. Lett.*, 1998, **73**, 918.
- [7] H. J. Jeong, H. K. Choi, G. Y. Kim, Y. Il Song, Y. Tong, S. C. Lim, Y. H. Lee, *Carbon*, 2006, **44**, 2689.
- [8] H. Liu, Q. Zhao, Y. Li, Y. Liu, F. Lu, J. Zhuang, S. Wang, L. Jiang, D. Zhu, D. Yu, and L. Feng, *J. Am. Chem. Soc.*, 2005, **127**, 1120.
- [9] U. N. Maiti, S. Maiti, T. P. Majumder and K. K. Chattopadhyay, *Nanotechnology*, 2011, **22**, 505703.
- [10] Y. Z. Jin, W. K. Hsu, Y. L. Chueh, L. J. Chou, Y. Q. Zhu, K. Brigatti, H. W. Kroto and D. R. M. Walton, *Angew. Chem. Int. Ed.*, 2004, **43**, 5670.
- [11] H. Liu, Z. Liu, X. Qian, Y. Guo, S. Cui, L. Sun, Y. Song, Y. Li, and D. Zhu, *Cryst. Growth Des.*, 2010, **10**, 237.

- [12] Y. W. Zhu, A. M. Moo, T. Yu, X. J. Xu, X. Y. Gao, Y. J. Liu, C. T. Lim, Z. X. Shen, C. K. Ong, A. T. S. Wee, J. T. L. Thong and C. H. Sow, *Chem. Phys. Lett.*, 2006, **419**, 458.
- [13] S. Q. Li, Y. X. Liang and T. H. Wang, *Appl. Phys. Lett.*, 2006, **88**, 053107.
- [14] B. Ha, S. H. Seo, J. H. Cho, C. S. Yoon, J. Yoo, G. C. Yi, C. Y. Park and C. J. Lee, *J. Phys. Chem. B*, 2005, **109**, 11095.
- [15] C. Ouyang, H. Liu, X. Qian, H. Lin, N. Chena, and Y. Li, *Dalton Trans.*, 2011, **40**, 3553.
- [16] Y. H. Baek and K. J. Yong, *J. Phys. Chem. C*, 2007, **111**, 1213.
- [17] X. S. Fang, Y. Bando, C. H. Ye, G. Z. Shen, U. K. Gautam, C. C. Tang and D. Golberg, *Chem. Commun.*, 2007, 4093.
- [18] K. Zheng, X. Li, X. Mo, G. Chen, Z. Wang and G. Chen, *Appl. Surf. Sci.*, 2010, **256**, 2764.
- [19] J. M. Wu, H. C. Shih and W. T. Wu, *Chem. Phys. Lett.*, 2005, **413**, 490.
